# Supplementary material for: Amorphous MnO2 supported on carbon nanotubes as a superior catalyst for low temperature NO reduction with NH3
Source: Royal Society of Chemistry journal article supplement (doi:10.1039/c3ra41512k), 2013-01-01
Supplement: c3ra41512k.pdf [file c3ra41512k.pdf]

## Electronic Supplementary Information

### Amorphous MnO<sub>2</sub> supported on carbon nanotubes as a superior catalyst for low temperature NO reduction with NH<sub>3</sub>

Xie Wang,<sup>a</sup> Yuying Zheng,<sup>\*a,b</sup> Zhe Xu,<sup>b</sup> Xiaoli Wang,<sup>b</sup> and Xiaoping Chen<sup>b</sup>

<sup>a</sup> College of Chemistry and Chemical Engineering, Fuzhou University, Fuzhou 350108, China.

<sup>b</sup> College of Materials Science and Engineering, Fuzhou University, Fuzhou 350108, China. E-mail: [yzyzheng@fzu.edu.cn](mailto:yzyzheng@fzu.edu.cn)

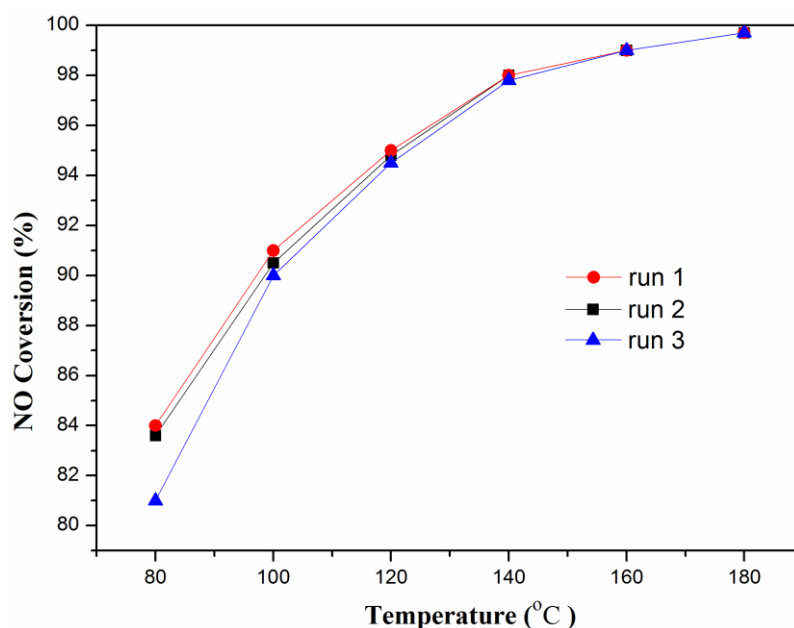

Fig. S1 Cyclic activities of 60 % MnO<sub>2</sub>/CNTs catalyst for SCR of NO with NH<sub>3</sub>

**Tab. S1** Comparison of activity of various CNTs-based catalysts for low temperature SCR of NO with NH<sub>3</sub>

| Catalyst                            | Preparation Method | Feed composition |                       |                    | C <sub>NO</sub> <sup>e</sup> (%) at 160 °C | SV (h <sup>-1</sup> ) | Ref.      |
|-------------------------------------|--------------------|------------------|-----------------------|--------------------|--------------------------------------------|-----------------------|-----------|
|                                     |                    | NO (ppm)         | NH <sub>3</sub> (ppm) | O <sub>2</sub> (%) |                                            |                       |           |
| MnO <sub>x</sub> /MWNTs             | WI <sup>a</sup>    | 900              | 900                   | 5                  | 78                                         | 30,000                | [1]       |
| CeO <sub>2</sub> /CNTs              | PT <sup>b</sup>    | 500              | 500                   | 3                  | 30                                         | 20,000                | [2]       |
| MnO <sub>x</sub> /MWNTs             | PVI <sup>c</sup>   | 1000             | 1000                  | 5                  | 30                                         | 40,000                | [3]       |
| CeO <sub>2</sub> /CNTs              | WI                 | 600              | 600                   | 3.5                | 38                                         | 100,000               | [4]       |
| V <sub>2</sub> O <sub>5</sub> /CNTs | WI                 | 800              | 800                   | 5                  | 75                                         | 35,000                | [5]       |
| MnO <sub>2</sub> /CNTs              | CP <sup>d</sup>    | 500              | 500                   | 5                  | 99                                         | 38,000                | This work |

<sup>a</sup> wet impregnation

<sup>b</sup> pyridine-thermal route

<sup>c</sup> pore volume impregnation

<sup>d</sup> co-precipitation

<sup>e</sup> NO conversion

- [1] M. Pourkhalil, A. Zarringhalam Moghaddam, A. Rashidi, J. Towfighi, K. Jafari Jozani and H. Bozorgzadeh, *Catalysis letters*, 2013, **143**, 184-192.
- [2] C. Fang, D. Zhang, L. Y. Shi, R. Gao, H. Li, L. Ye and J. Zhang, *Catalysis Science & Technology*, 2013, 803-811.
- [3] L. Wang, B. Huang, Y. Su, G. Zhou, K. Wang, H. Luo and D. Ye, *Chemical Engineering Journal*, 2012, **192**, 232-241.
- [4] X. Chen, S. Gao, H. Wang, Y. Liu and Z. Wu, *Catalysis Communications*, 2011, **14**, 1-5.
- [5] B. Huang, R. Huang, D. Jin and D. Ye, *Catalysis Today*, 2007, **126**, 279-283.
